# Supplementary material for: Expression of Genes Involved in Heavy Metal Trafficking in Plants Exposed to Salinity Stress and Elevated Cd Concentrations
Source: MDPI journal article supplement (doi:10.3390/plants9040475), 2020-04-09
Supplement: s1 [file s1]

**Sequences of primers used during qPCR analysis**

| Name                                     | Accession number | Sequence (5'–3')                                    |
|------------------------------------------|------------------|-----------------------------------------------------|
| ABCC2 – ATP-BINDING CASSETTE SUBFAMILY C | AT2G34660        | F:AAACCGTTGGCTTGCTATCC<br>R:ACCTACCCGTTCAACAGCAT    |
| CAX4 – CATION EXCHANGER                  | AT5G01490        | F: TGGGCGATTGTGGTTCTACT<br>R: TCAGTCAACAGCTTCTCCCAT |
| HMA4 – HEAVY METAL ATPASE                | AT2G19110        | F:ACTGAAGCCACTTGAAGGAGT<br>R:CGCGAGCAATAACCCTGATA   |
| IRT2 – IRON REGULATED TRANSPORTER        | AT4G19680        | F: CCATCTTCGATTTCCACCCG<br>R: GCGATTCAACCTCCACGTTT  |
| PCS1 – PHYTOCHELATIN SYNTHASE            | AT5G02190        | F:AGCCAAGCATGCAACTTTCC<br>R:CCCCGCCATTGAATTTGCTT    |
| UBQ – UBIQUITINE                         | AF053563         | F: CGCACCTTGGCTGACTACA<br>R: AACAACCAGACCATGCAACA   |
| ZIP4 – ZINC REGULATED PROTEIN            | AT1G10970        | F:ACGAGGATTGAAACGAGTGC<br>R:AAACCCACCTTCGCTTTTC     |
