# Supplementary figures and images for: Expression of Genes Involved in Heavy Metal Trafficking in Plants Exposed to Salinity Stress and Elevated Cd Concentrations
Source: MDPI journal article supplement (doi:10.3390/plants9040475), 2020-04-09

# Supplementary Fig. S1

**NaCl-  
untreated  
(-NaCl)**

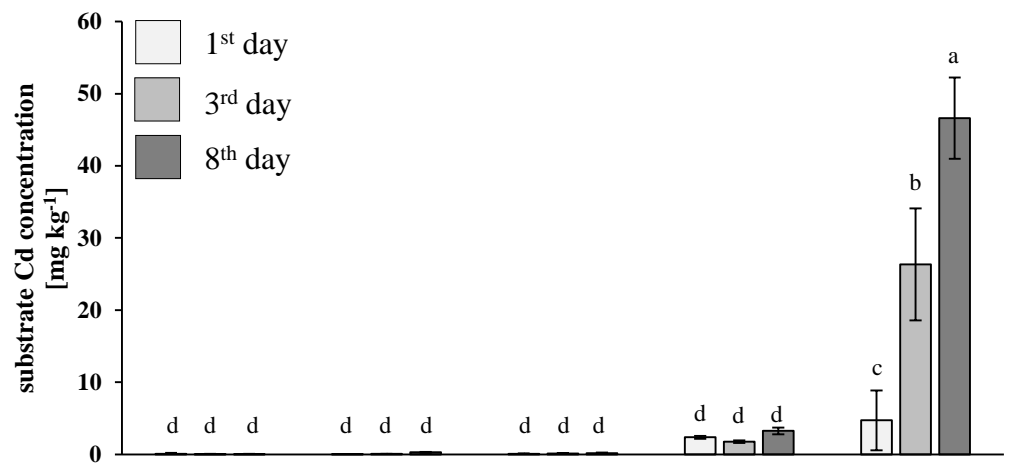

**salt-  
stressed  
(+NaCl)**

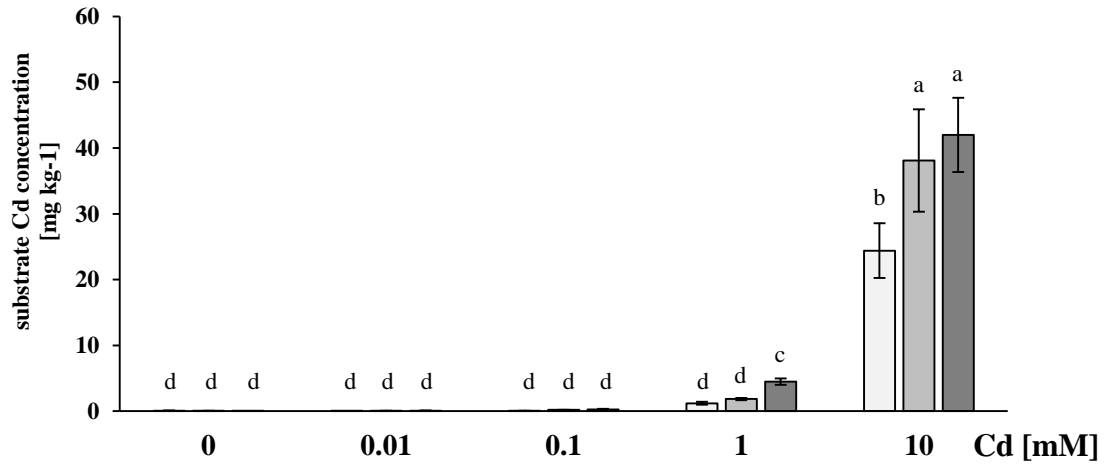

Supplement: s1 [file s1]
